# Supplementary material
Source: PubMed Central journal article supplement (PMC5600839)

Low Score

High Score

HER2  
Murine  
Mammary  
Carcinoma

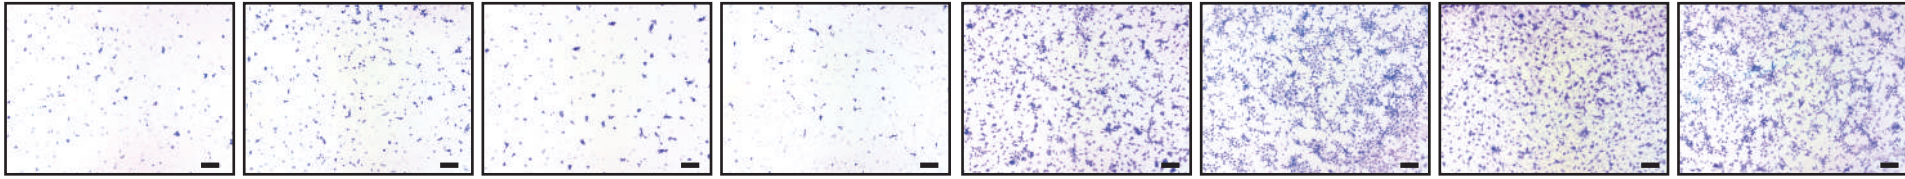

**Supplemental Figure 1**

Supplement: NIHMS886727-supplement-1.pdf [file NIHMS886727-supplement-1.pdf]

### *In vitro* Proliferation Assay

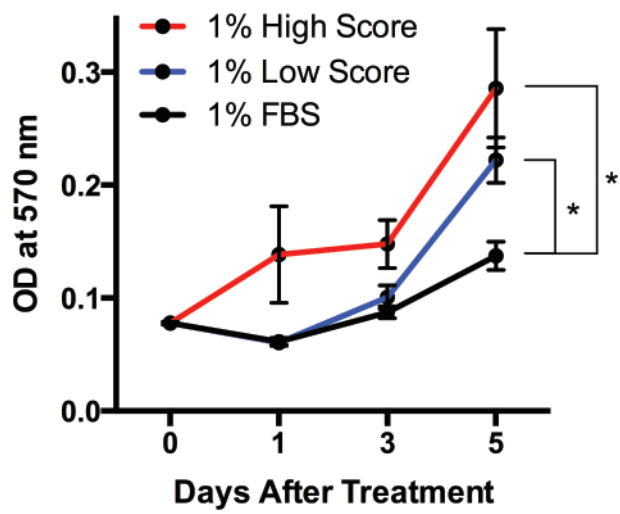

**Supplemental Figure 2**

Supplement: NIHMS886727-supplement-2.pdf [file NIHMS886727-supplement-2.pdf]

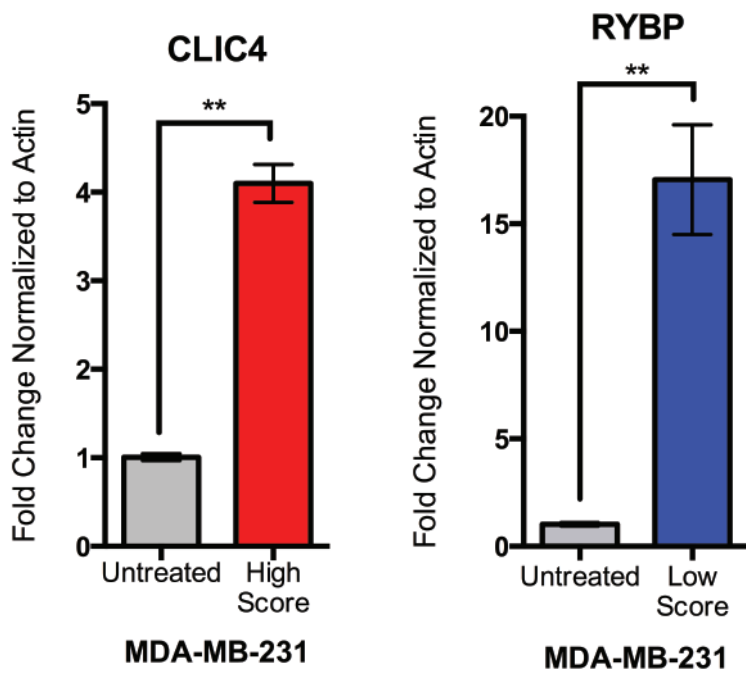

Supplemental Figure 3

Supplement: NIHMS886727-supplement-3.pdf [file NIHMS886727-supplement-3.pdf]
